# Supplementary material for: Oxidative cyclization of thiosemicarbazide: a chemodosimetric approach for the highly selective fluorescence detection of cerium(iv)
Source: Royal Society of Chemistry journal article supplement (doi:10.1039/d0nj01100b), 2020-01-01
Supplement: d0nj01100b1.pdf [file d0nj01100b1.pdf]

# Oxidative cyclization of thiosemicarbazide: chemo-dosimetric approach for highly selective fluorescence detection of cerium(IV)

Ahad Shaikh<sup>a</sup>, Pallabi Mukherjee<sup>a</sup>, Sabyasachi Ta,<sup>a</sup> Arunasis Bhattacharyya<sup>b\*</sup>, Abhijit Ghosh<sup>\*a</sup> and Debasis Das<sup>a\*</sup>

<sup>a</sup>Department of Chemistry, The University of Burdwan, Burdwan, 713104, W.B., India

<sup>b</sup>Radiochemistry Division, Bhabha Atomic Research Centre, Trombay, Mumbai-400085, India

Correspondence: D Das: [ddas100in@yahoo.com](mailto:ddas100in@yahoo.com)

## Experimental

### Apparatus and reagents

Hydrazine hydrate, 9-anthracenecarboxaldehyde, phenyliso-thiocyanate, 2-thiophenecarboxaldehyde, thiosemicarbazide and salicaldehyde are purchased from Sigma-Aldrich (USA). Solvents used are of spectroscopic grade. Other chemicals are analytical reagent grade and used without further purification, unless specified otherwise. Milli-Q Millipore 18.2 MΩ cm<sup>-1</sup> water is used where needed. A Shimadzu Multi Spec 2450 spectrophotometer was used for recording UV-vis spectra. FTIR spectra are recorded on a Shimadzu FTIR spectrophotometer (Shimadzu). Mass spectra are recorded with a QTOF 60 Micro YA 263 mass spectrometer in ES positive mode. <sup>1</sup>H NMR spectra of A12 and A12i and <sup>13</sup>C NMR spectrum of A12 were performed with a Bruker Advance 600 (600 MHz) NMR. <sup>1</sup>H NMR spectra of A12a and A12b are recorded with a Bruker Advance 300 (300 MHz). Elemental analyses are performed on a Perkin-Elmer 2400 CHN analyzer. The steady state emission and excitation spectra are recorded with a Hitachi F-4500 spectro-fluorimeter. All spectra are recorded at room temperature.

### General method of UV-Vis and fluorescence titration

The cell path length for absorption and emission measurement is 1 cm. Stock solutions of A12, A12a, A12b and Ce<sup>4+</sup> are prepared in aqueous-methanol (1: 4, v/v, 0.1 M HEPES, pH 7.4). Working solutions of A12, A12a, A12b and Ce<sup>4+</sup> are prepared from respective stock solutions. Fluorescence measurement has been performed using 2.5 × 2.5 nm slit width.

### Determination of detection limit

From fluorescence titration experiment, emission intensities at λ<sub>em</sub> = 508 nm at low Ce<sup>4+</sup>

concentration regions are normalized between the minimum and maximum values  $\frac{I_x - I_0}{I_{max} - I_0}$ .

Linear regression curve is then fitted to the normalized data, and the point at which the line crosses the ordinate axes have been considered as the detection limit.<sup>1</sup>

### **Synthesis of anthracen-9-ylmethylene-hydrazine (X3, Scheme 1)**

10 mL (~ 200 mmol) hydrazine hydrate is taken in a 50 mL round bottom flask and placed over a magnetic stirrer. Another solution containing 9-anthracenecarboxaldehyde (3.0 g, ~14.55 mmol) dissolved in minimum methanol is added drop wise with continuous stirring. After stirring for 6h, the solution is filtered off. The filtrate is then poured in 50 mL water whereby a precipitate appeared which is collected by filtration and dried in air. ESI-MS(+) m/z, Calculated for C<sub>15</sub>H<sub>12</sub>N<sub>2</sub>: 221.10; found: 221.20 [M+H]<sup>+</sup> (Fig. S1, ESI<sup>†</sup>).

### **Synthesis of 5-(anthracen-9-yl)-N-phenyl-1, 3, 4-thiadiazol-2-amine (A12) (Scheme 1)**

Phenyl isothiocyanate (135 mg, ~1 mmol) was added drop wise to a solution of X3 (220 mg, ~1 mmol) in THF and stirred magnetically at room temperature. After 10 minutes the round bottom flask was transferred to an oil bath and the stirring was continued to further 4h at 80 °C. The resulting yellow color solution was kept for slow evaporation to get a deep yellow colored crystalline solid suitable for single crystal X-ray diffraction. The yield was 90%. Anal. calcd. (%): C, 74.34; H, 4.82; N, 11.82 and S, 9.02 found: C, 74.19; H, 4.90; N, 11.75 and S, 9.06. <sup>1</sup>H NMR [600 MHz, DMSO-*d*<sub>6</sub>, TMS, J (Hz), δ (ppm)]: 12.03 (1H, s), 9.99 (1H, s), 9.39 (1H, s), 8.72 (1H, s), 7.72 (2H, d, J = 13.2), 8.15 (2H, d, J = 11.4), 7.59 (6H, m, J = 3.6), 7.34 (2H, m, J = 11.4), 7.18 (1H, m, J = 10.8) (Fig. S2, ESI<sup>†</sup>). <sup>13</sup>C NMR [600 MHz, DMSO-*d*<sub>6</sub>, TMS, δ (ppm)]: 176.40, 142.97, 139.48, 131.31, 130.12, 129.93, 129.39, 128.51, 127.76, 126.07, 125.64, 125.57, 125.28 (Fig. S3, ESI<sup>†</sup>). ESI-MS (+), m/z, calculated for C<sub>22</sub>H<sub>15</sub>N<sub>3</sub>S: 356.11. found: 356.35 [M+H]<sup>+</sup> (Fig. S4, ESI<sup>†</sup>). FT-IR (Fig. S5, ESI<sup>†</sup>).

### **Synthesis of 1-(anthracen-9-ylmethylene)-2-(thiophen-2-ylmethylene)hydrazine (A12a) (Scheme 1)**

A methanol solution of X3 (220 mg, 1 mmol) and 2-thiophenecarboxaldehyde (112 mg, ~1 mmol) is refluxed for 6h. The resulting pale yellow solution is kept for slow evaporation to get a red solid which upon crystallization from 1:1 methanol-methylene chloride yielded plate shape X-ray quality crystals. The yield is 85%. Anal. calcd. (%): C, 76.40; H, 4.49 and N, 8.91; found: C, 76.46; H, 4.43 and N, 8.88. <sup>1</sup>H NMR [300 MHz, CDCl<sub>3</sub>, TMS, J (Hz), δ (ppm)]: 13.30 (1H, s), 9.74 (1H, s), 8.88 (1H, s), 8.25 (1H, d, J = 9.0), 7.94 (2H, q, J = 8.4), 7.62 (3H, d, J = 5.7), 7.55 (1H, s), 7.48 (1H, d, J = 8.1), 7.33 (2H, t, J = 13.8) (Fig. S6, ESI<sup>†</sup>). ESI-MS (+), m/z, calcd. for C<sub>20</sub>H<sub>14</sub>N<sub>2</sub>S: 315.09, found: 315.08 [M+H]<sup>+</sup> (Fig. S7, ESI<sup>†</sup>). FT-IR (Fig. S8, ESI<sup>†</sup>).

### Synthesis of 2-(2-hydroxybenzylidene)hydrazine-1-carbothioamide (A12b) (Scheme 1)

A methanol solution of thiosemicarbazide (91 mg, ~1 mmol) and salicylaldehyde (122 mg, ~1 mmol) is refluxed for 4 h to get a green-yellow solution. The solution is allowed to slow evaporation. After several days, X-ray quality rod shape yellow crystals appeared. Yield: 87%. Anal. calcd (%): C, 49.22; H, 4.65; and N, 21.52; found: C, 49.18; H, 4.63 and N, 21.55. <sup>1</sup>H NMR [300 MHz, CDCl<sub>3</sub>, TMS, J (Hz), δ (ppm)]: 11.32 (1H, s), 9.60 (1H, s), 8.32 (1H, s), 7.66 (2H, s), 7.44 (1H, s), 7.24 (1H, d, J = 7.2), 6.93 (2H, q, J = 7.8) (Fig. S9, ESI<sup>†</sup>). ESI-MS(+) m/z, calcd. for C<sub>8</sub>H<sub>9</sub>N<sub>3</sub>OS: 196.05; found: 196.08 [M+H]<sup>+</sup>, (Fig. S10, ESI<sup>†</sup>). FT-IR (Fig. S11, ESI<sup>†</sup>).

### Synthesis of 5-(anthracen-9-yl)-4-phenyl-4,5-dihydro-3H-1,2,4-triazole-3-thione (A12i)

A methanol solution of CAN (0.5 g, ~0.91 mmol) was added drop wise to a magnetically stirred solution of A12 (0.2 g, ~0.56 mmol) in methanol. After addition the stirring was continued for further 10 minutes. After filtration the solution was kept for evaporation at room temperature. After removal of the solvent, a solid product was obtained which was used for MASS (Fig. S12, ESI<sup>†</sup>) and FT-IR (Fig. S13, ESI<sup>†</sup>) spectroscopy. The absorption and emission spectra of an arbitrary concentration of A12i in aqueous ethanol is shown in Fig. S14, ESI<sup>†</sup>).

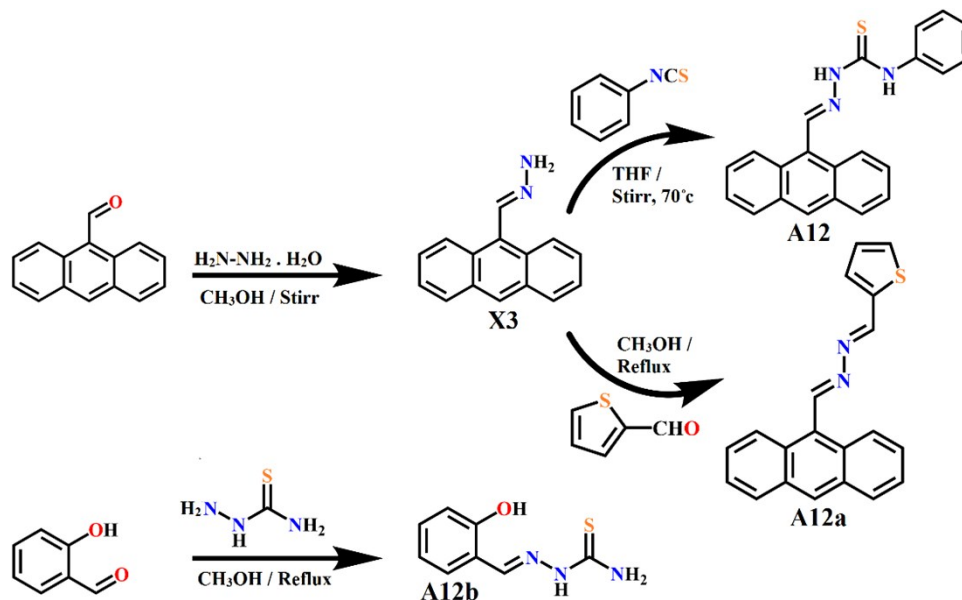

Scheme S1 Synthetic protocol of the probes

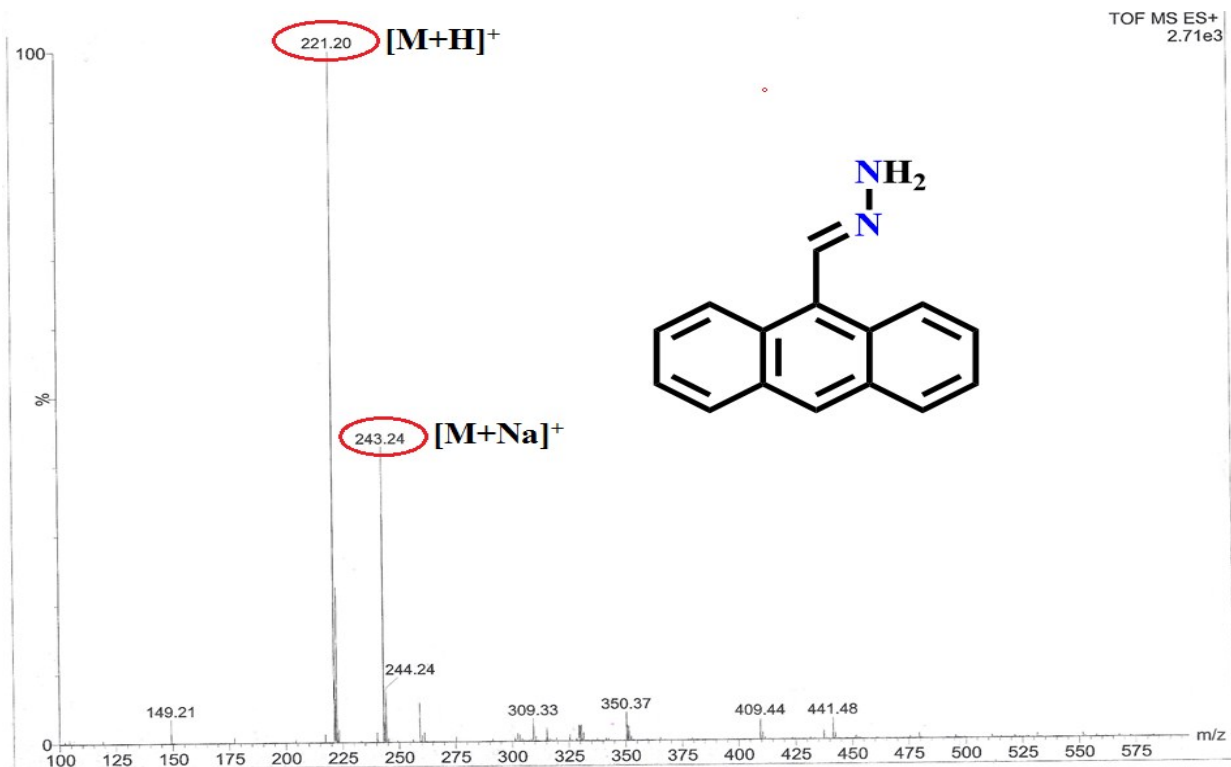

Fig.S1 Mass spectrum of X3

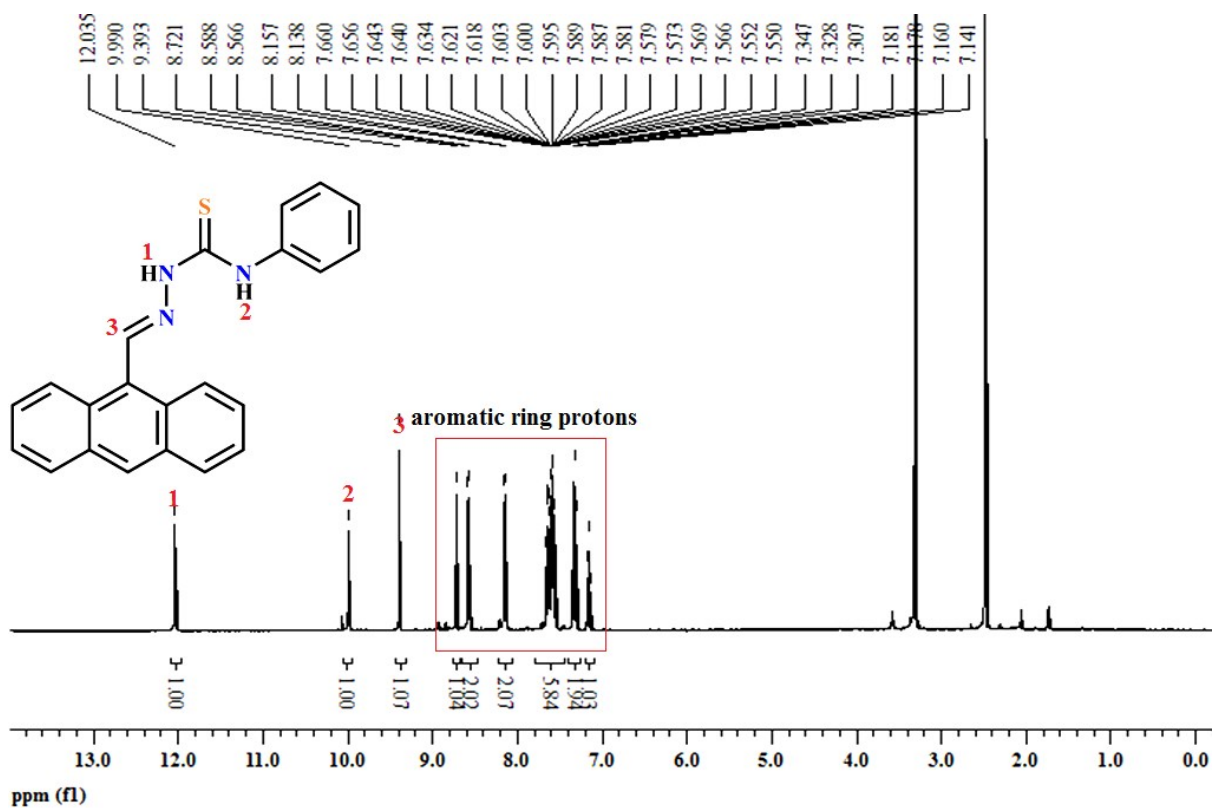

Fig.S2  $^1H$  NMR spectrum of A12 in  $DMSO-d_6$

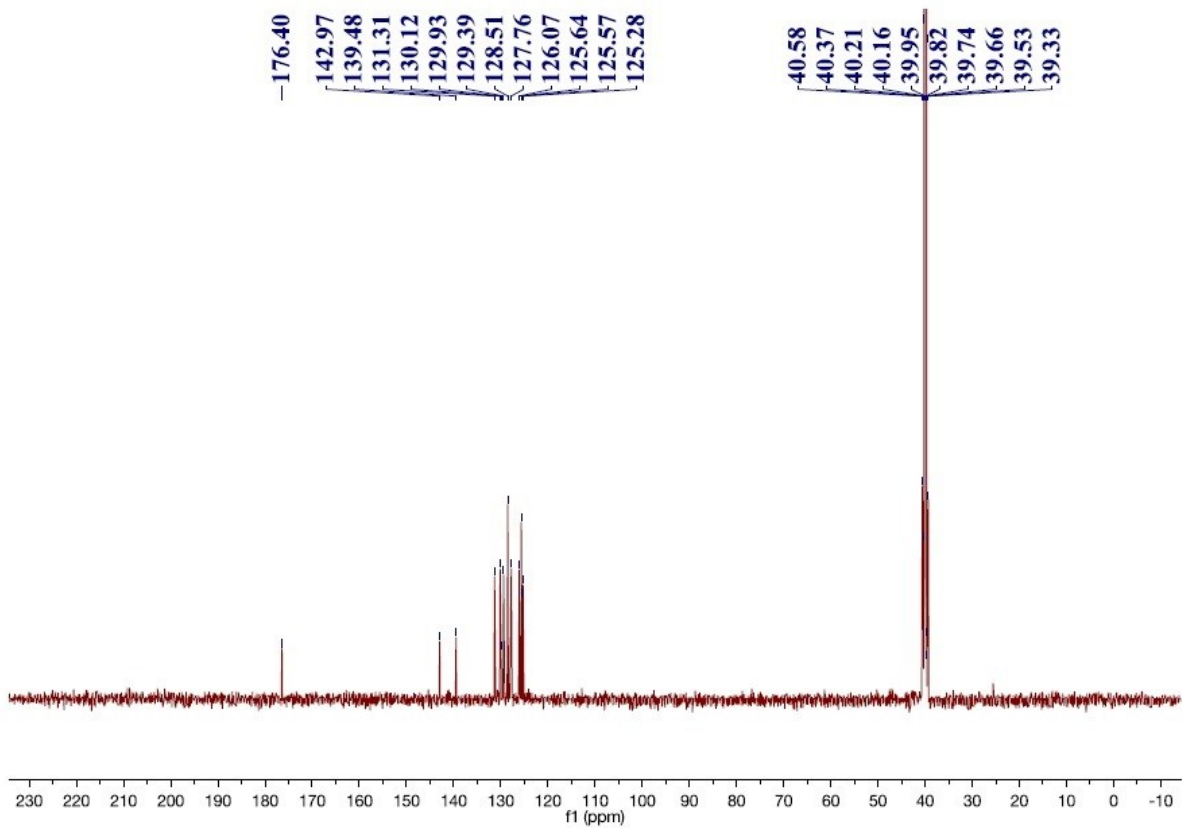

Fig.S3  $^{13}\text{C}$  NMR spectrum of A12 in  $\text{DMSO-}d_6$

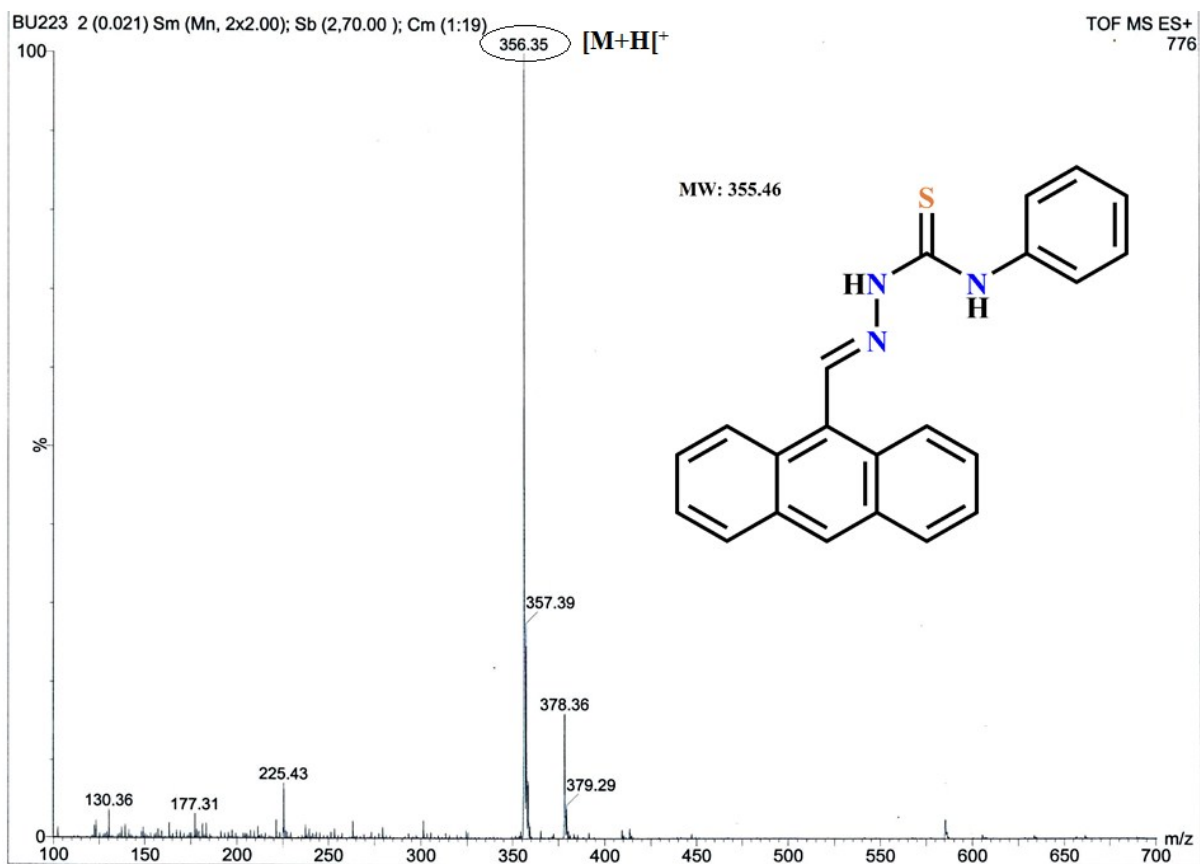

Fig.S4 Mass spectrum of A12

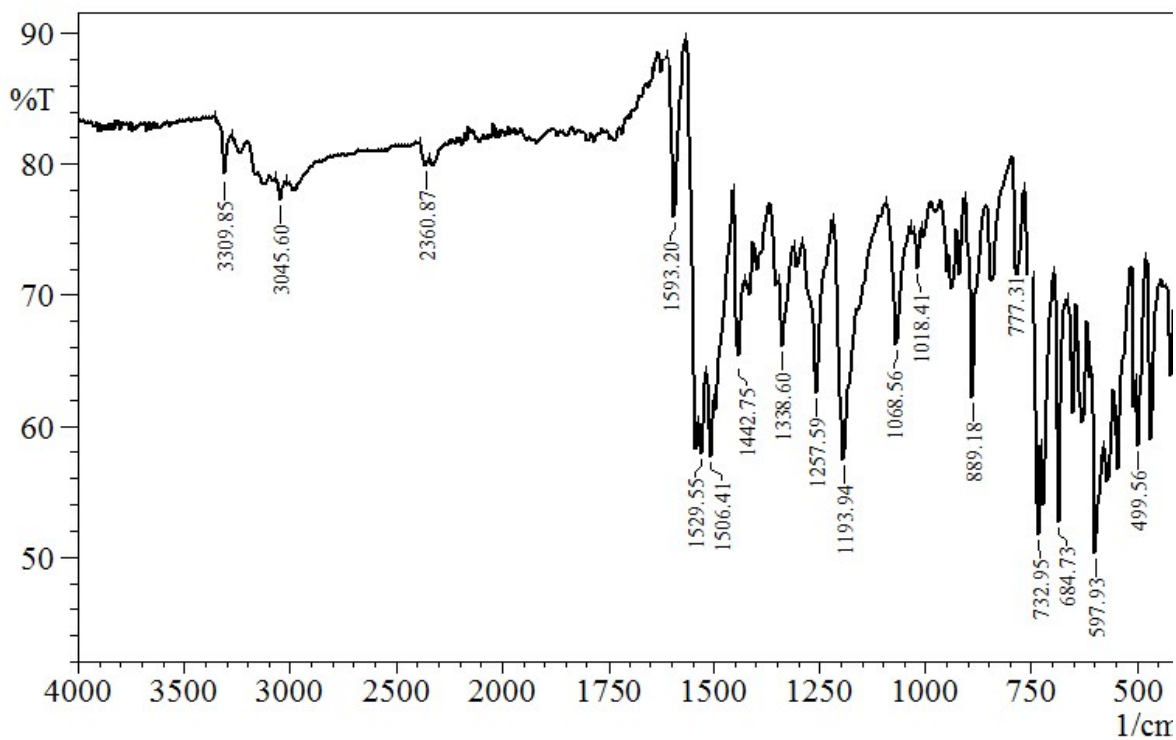

Fig.S5 FTIR spectrum of A12

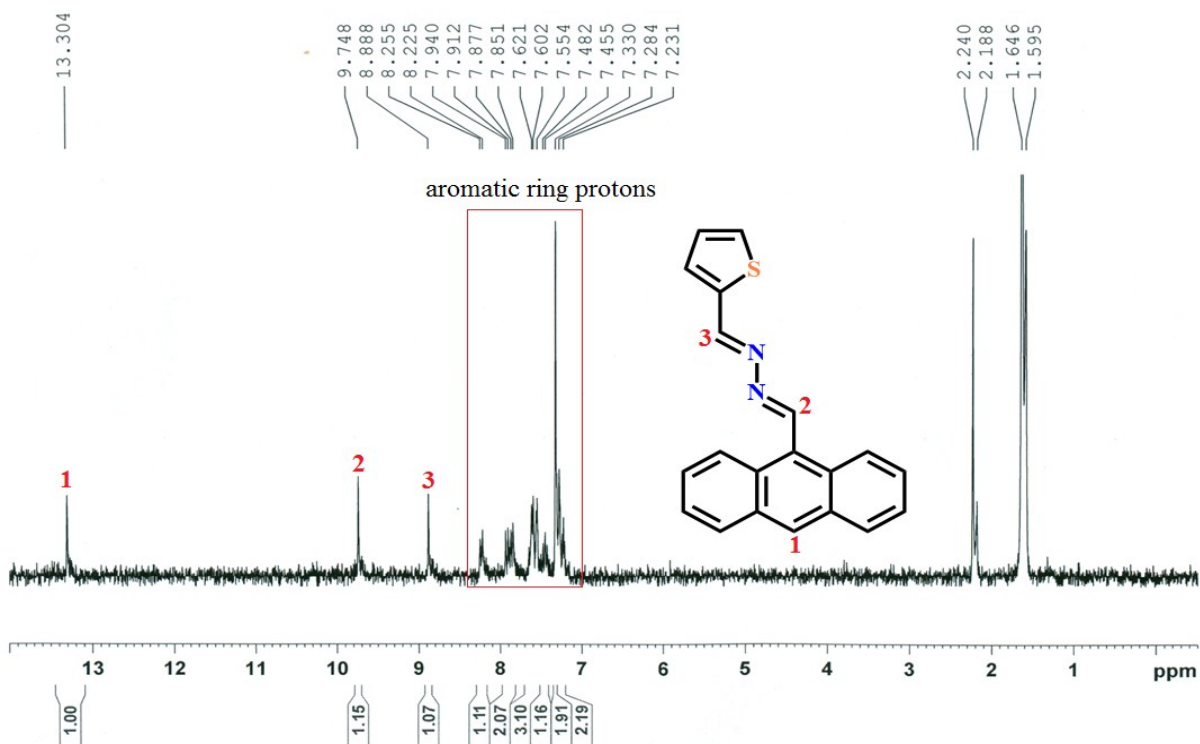

Fig.S6  $^1\text{H}$  NMR spectrum of A12a in  $\text{CDCl}_3$

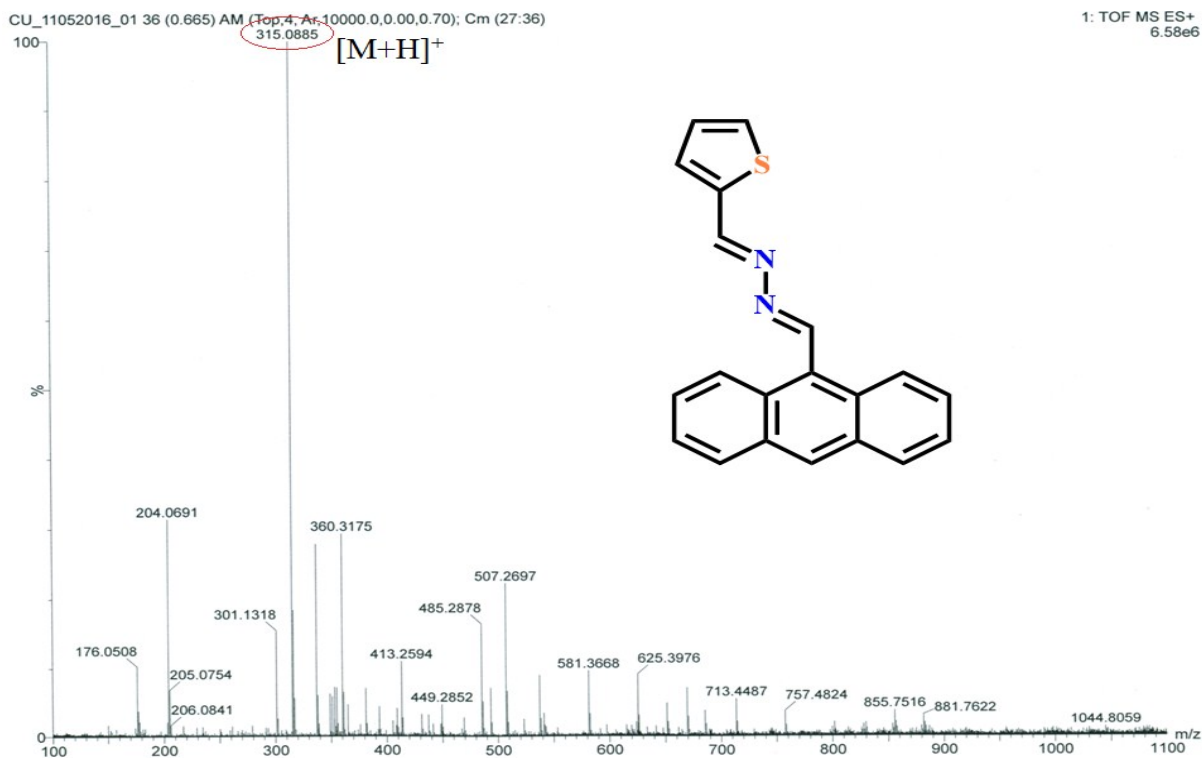

Fig.S7 Mass spectrum of A12a

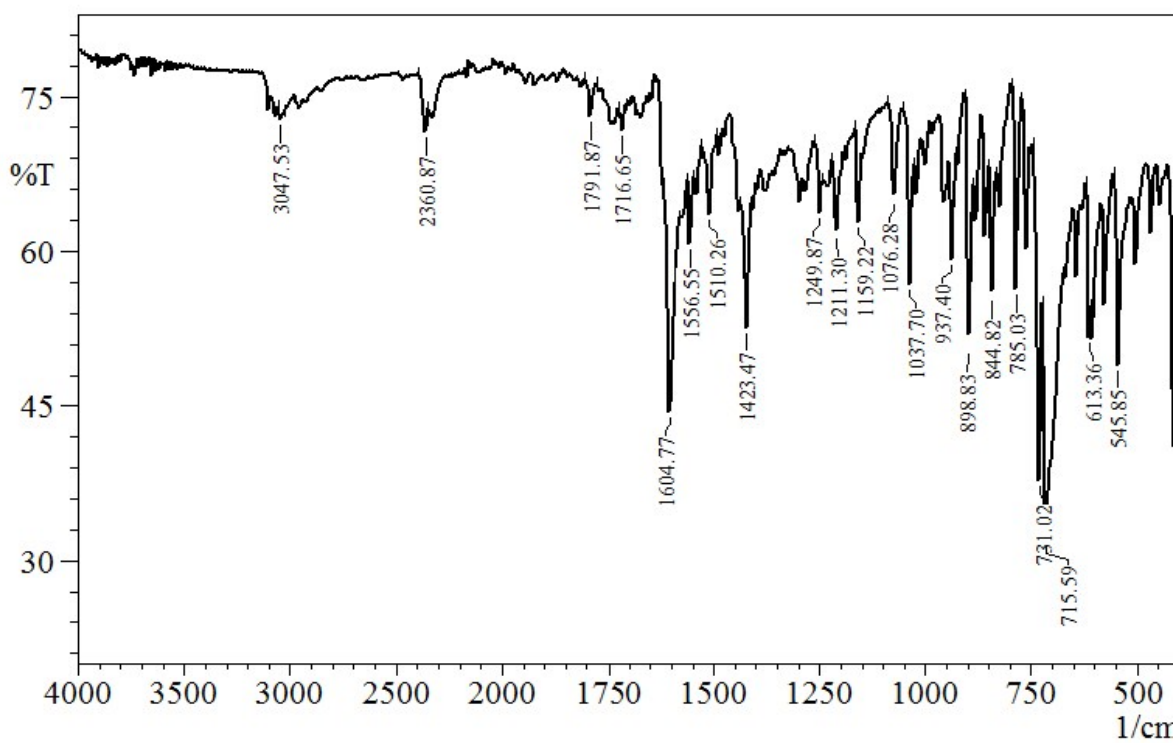

Fig.S8 FTIR spectrum of A12a

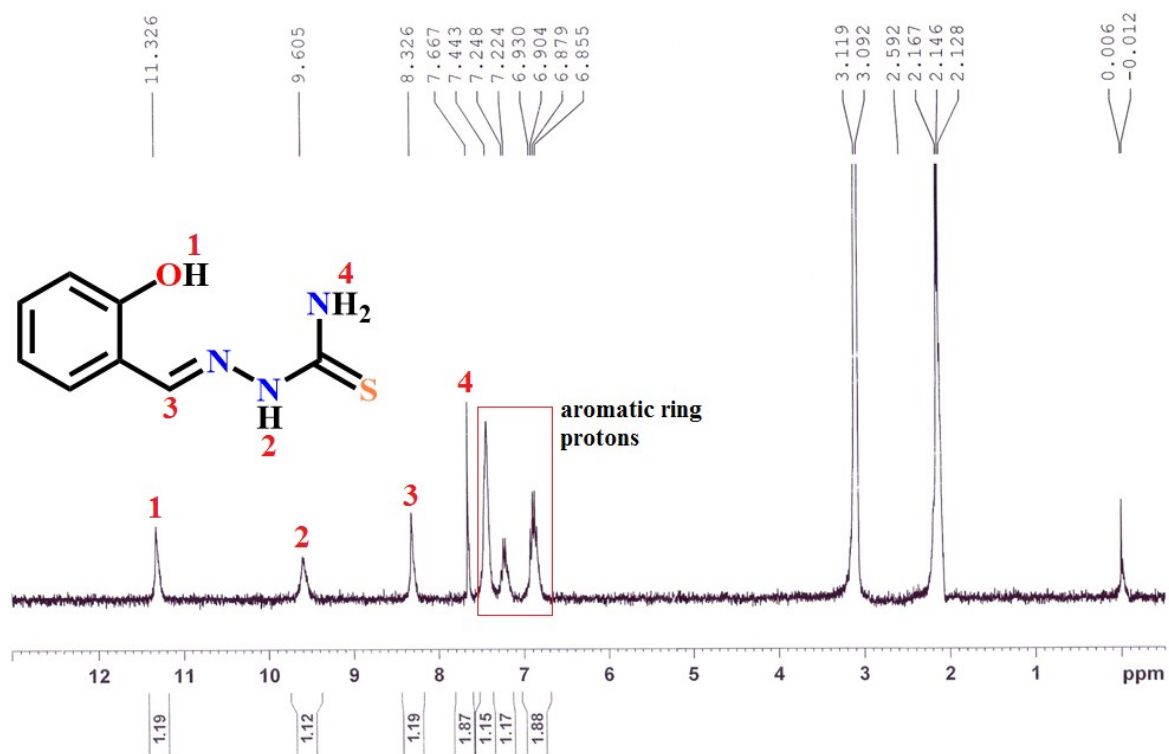

Fig.S9 <sup>1</sup>H NMR spectrum of A12b in CDCl<sub>3</sub>

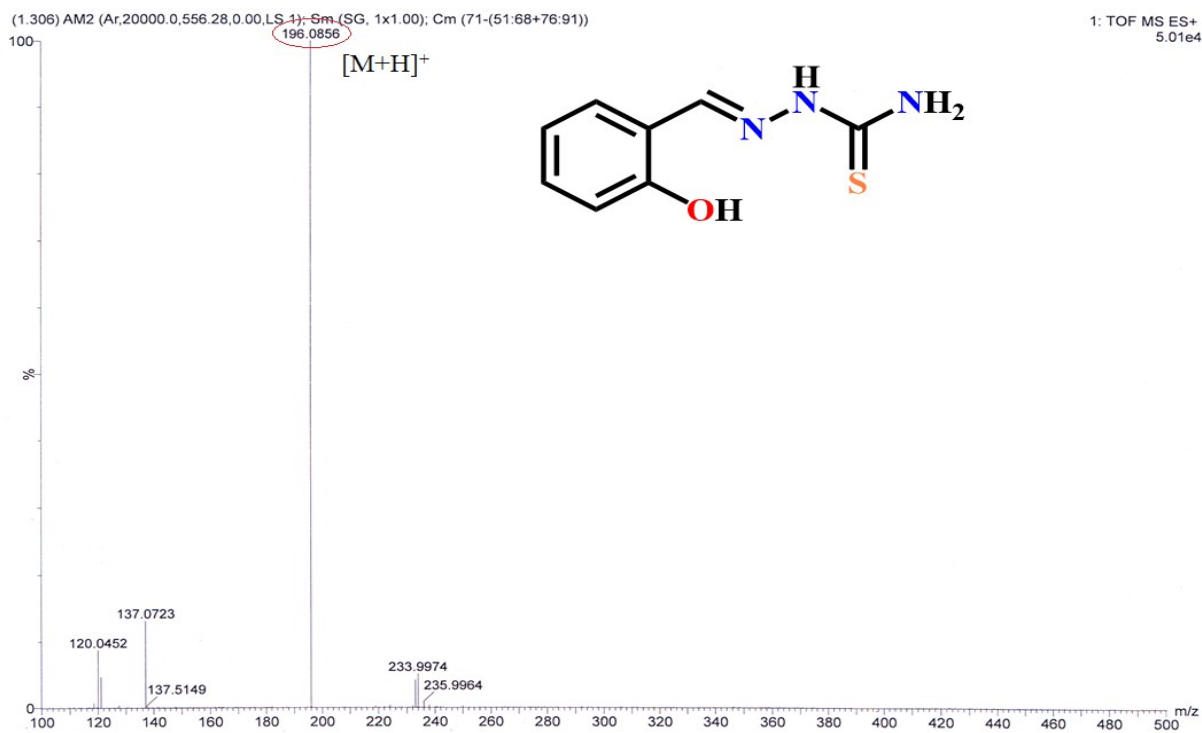

Fig.S10 Mass spectrum of A12b



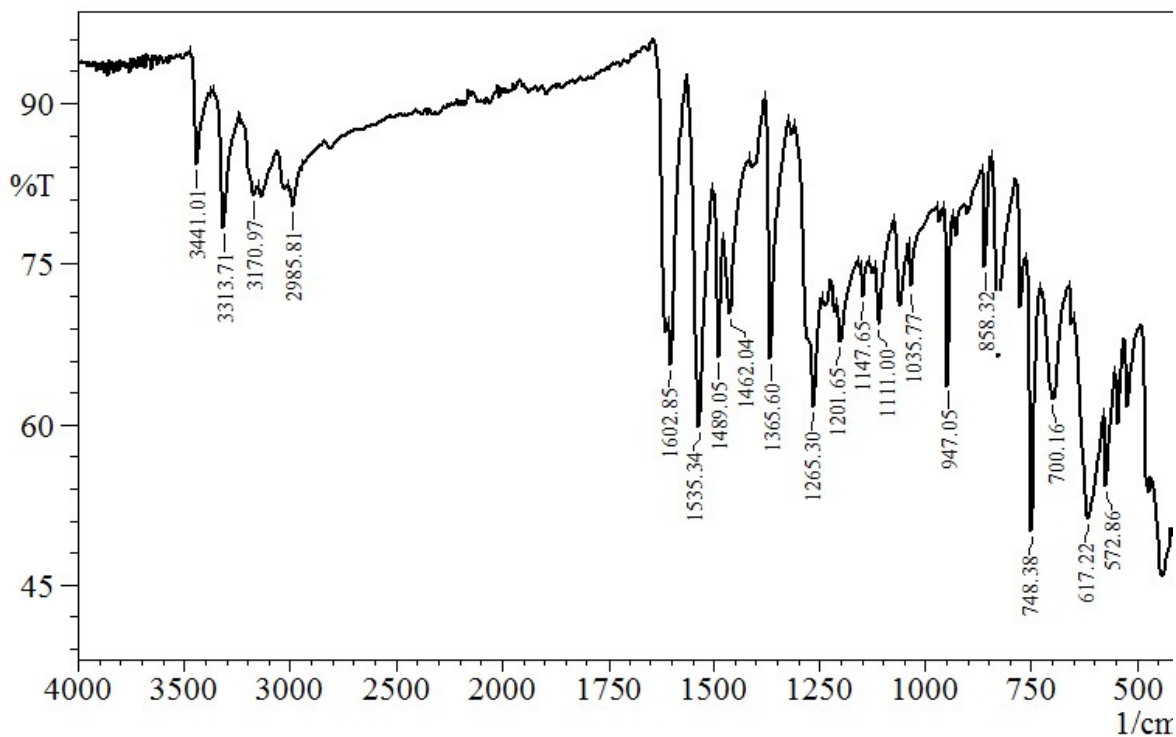

Fig.S11 FTIR spectrum of A12b

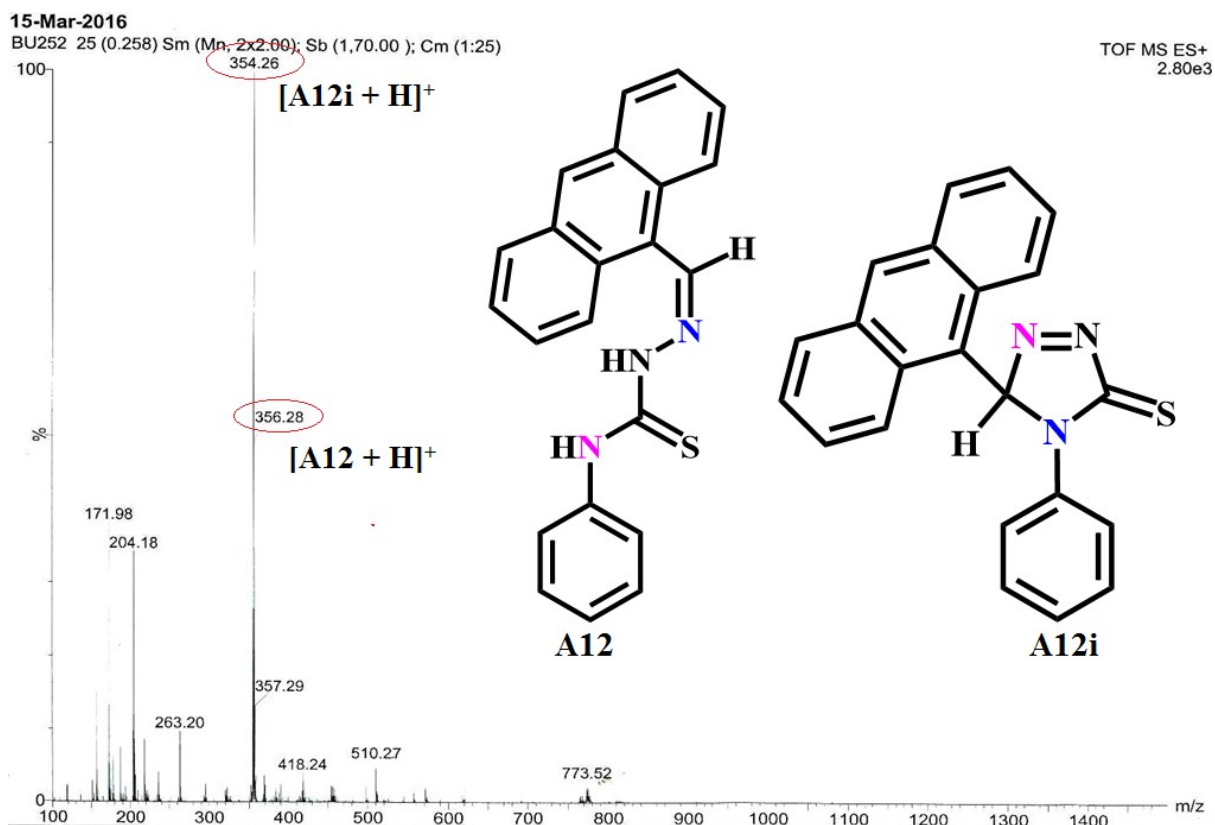

Fig.S12 Mass spectrum of A12i

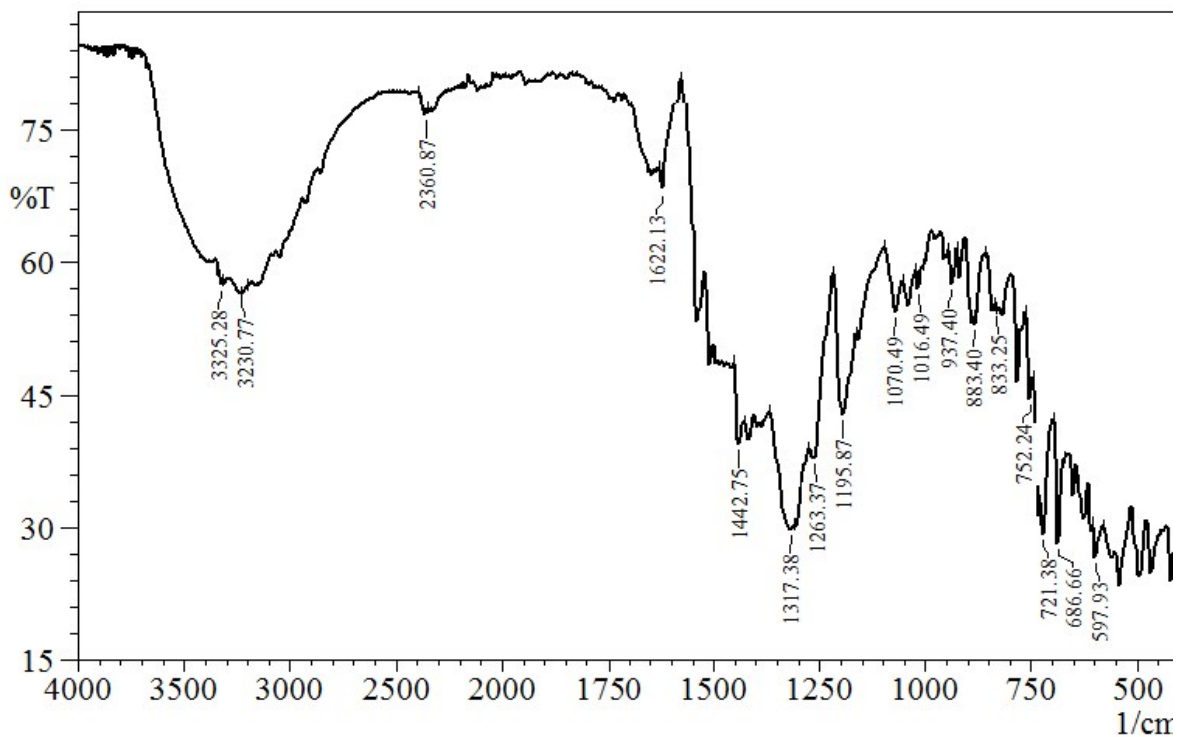

**Fig.S13** FTIR spectrum of A12i

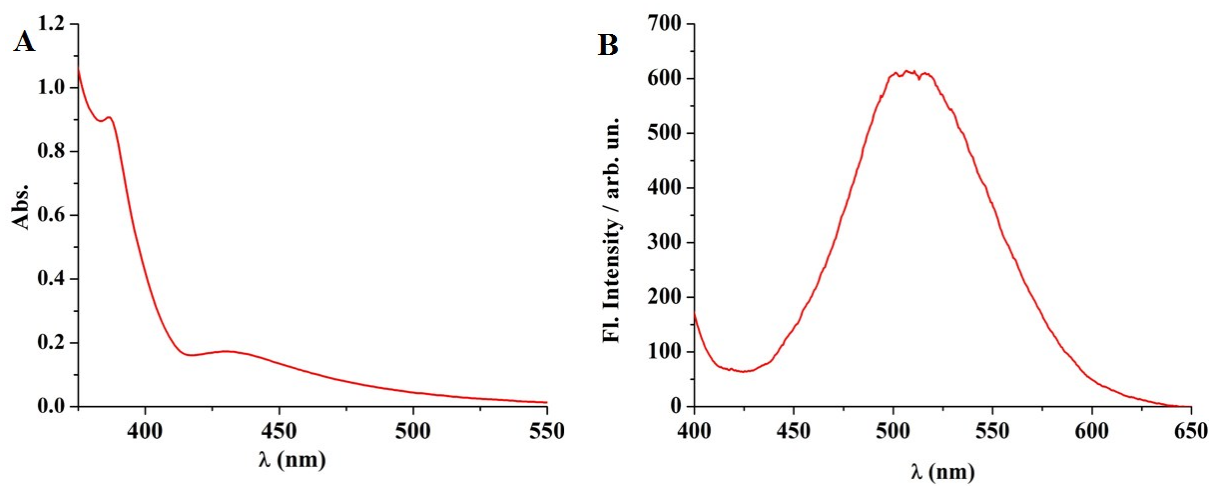

**Fig.S14** (A) Absorption and (B) emission ( $\lambda_{\text{ex}}$ , 375 nm) spectra of A12i (ethanol-water, 4: 1, v/v)

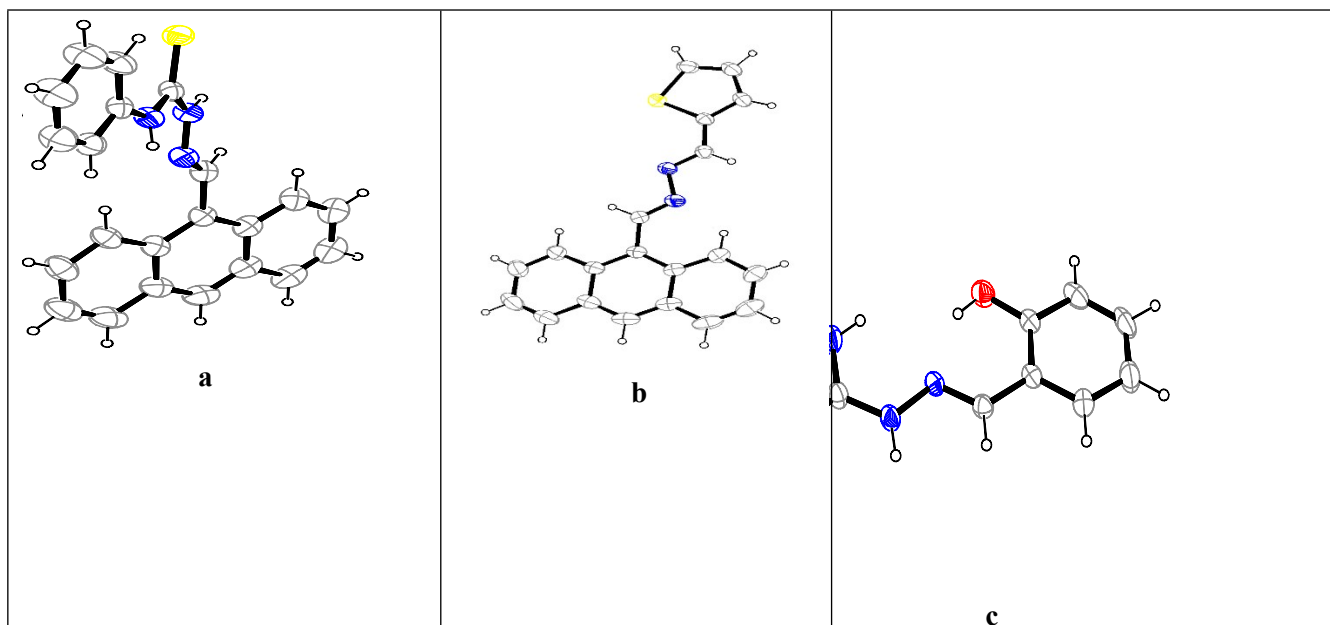

**Fig.S15** ORTEP view of (a) A12 (b) A12a (c) A12b

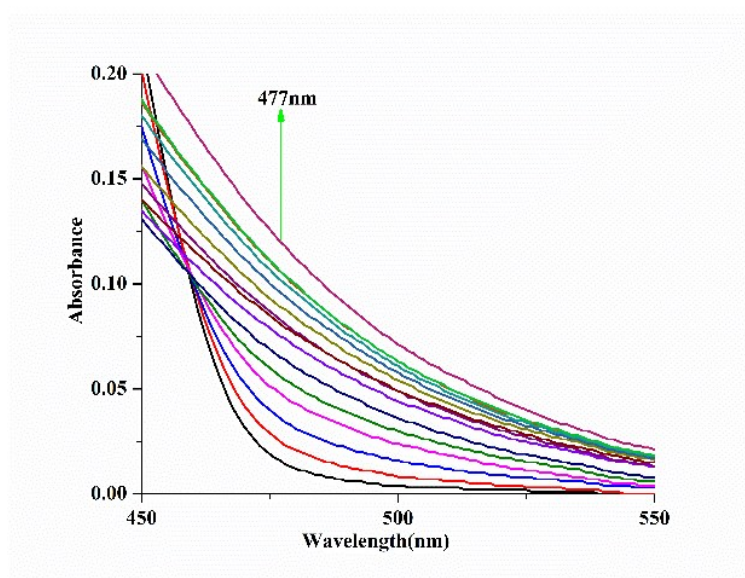

**Fig.S16** Expanded view of the new weak band that appeared at 477 nm in the absorption spectra of A12 (10  $\mu$ M, ethanol-water, 4: 1, v/v, 1 M HEPES buffer, pH 7.4) upon gradual addition of  $Ce^{4+}$  (0-200  $\mu$ M).

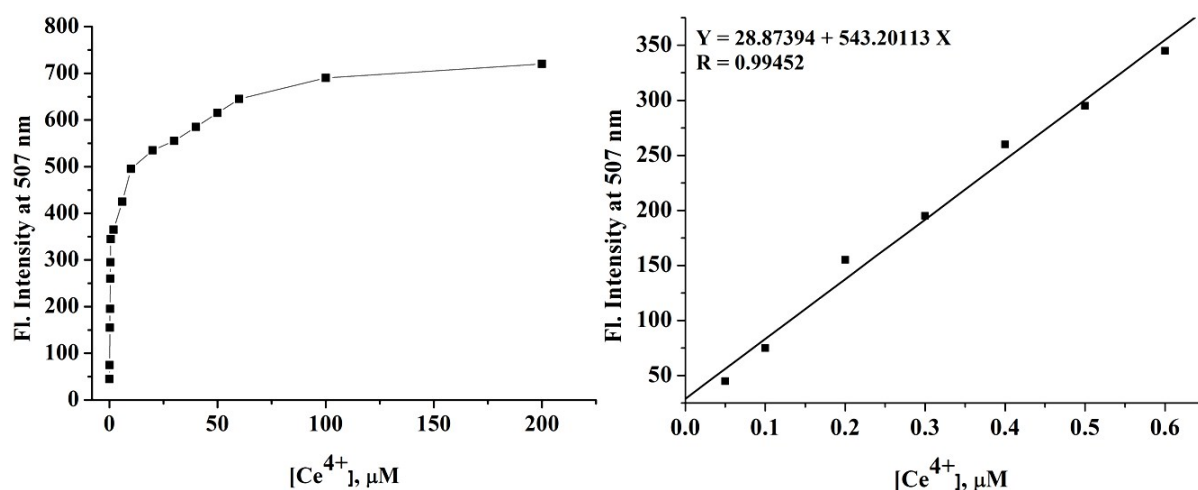

**Fig.S17** Emission intensities of A12 (10 μM, ethanol– water, 4 : 1, v/v, 1 M HEPES buffer, pH 7.4,  $\lambda_{\text{ex}}$ , 375 nm;  $\lambda_{\text{em}}$ , 508 nm) as a function of added Ce<sup>4+</sup> (0- 200 μM). Linear region of the plot (right)

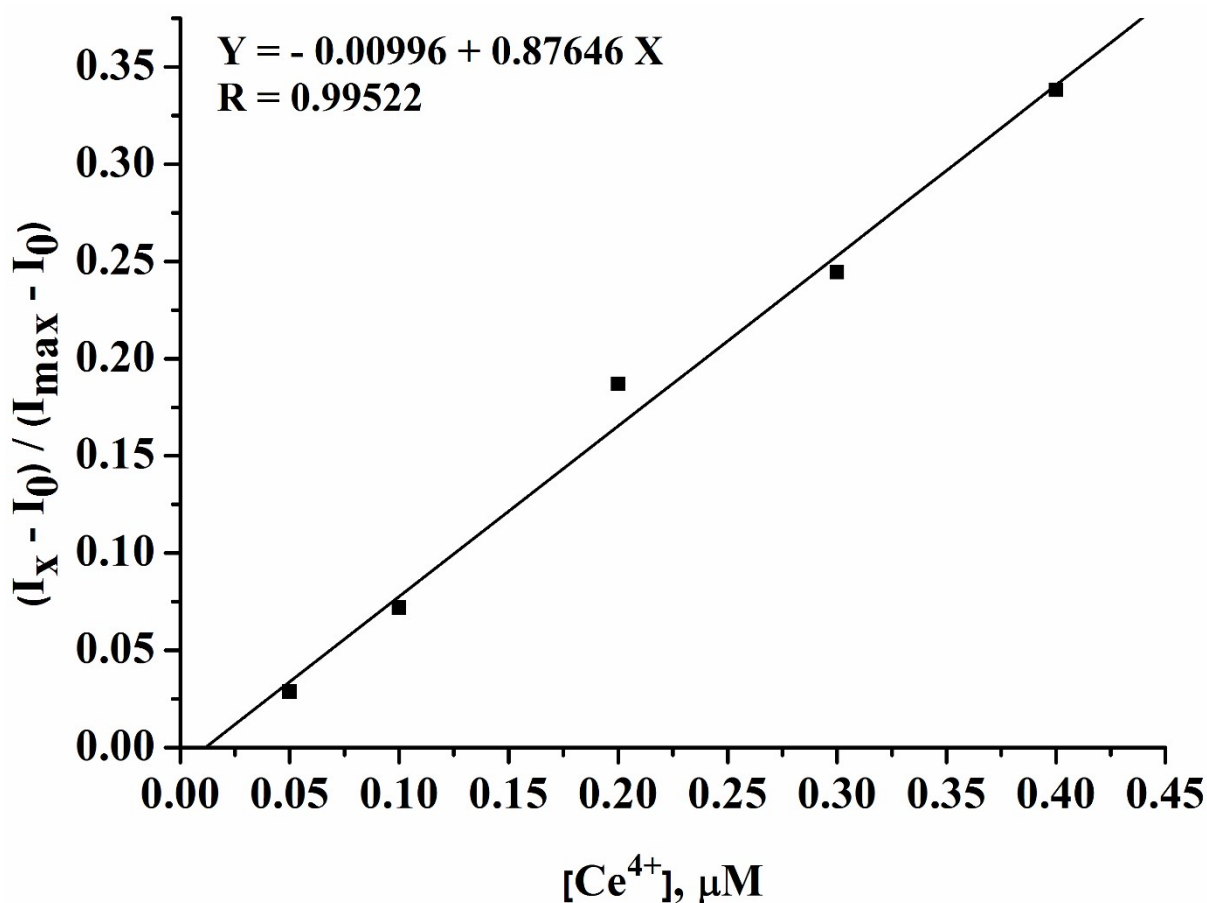

**Fig.S18** Emission intensities of A12 (10 μM,  $\lambda_{\text{ex}}$ , 375 nm;  $\lambda_{\text{em}}$ , 508 nm (from Fig. 4) as a function of added Ce<sup>4+</sup> in ethanol– water (4 : 1, v/v), 1 M HEPES buffer, pH 7.4

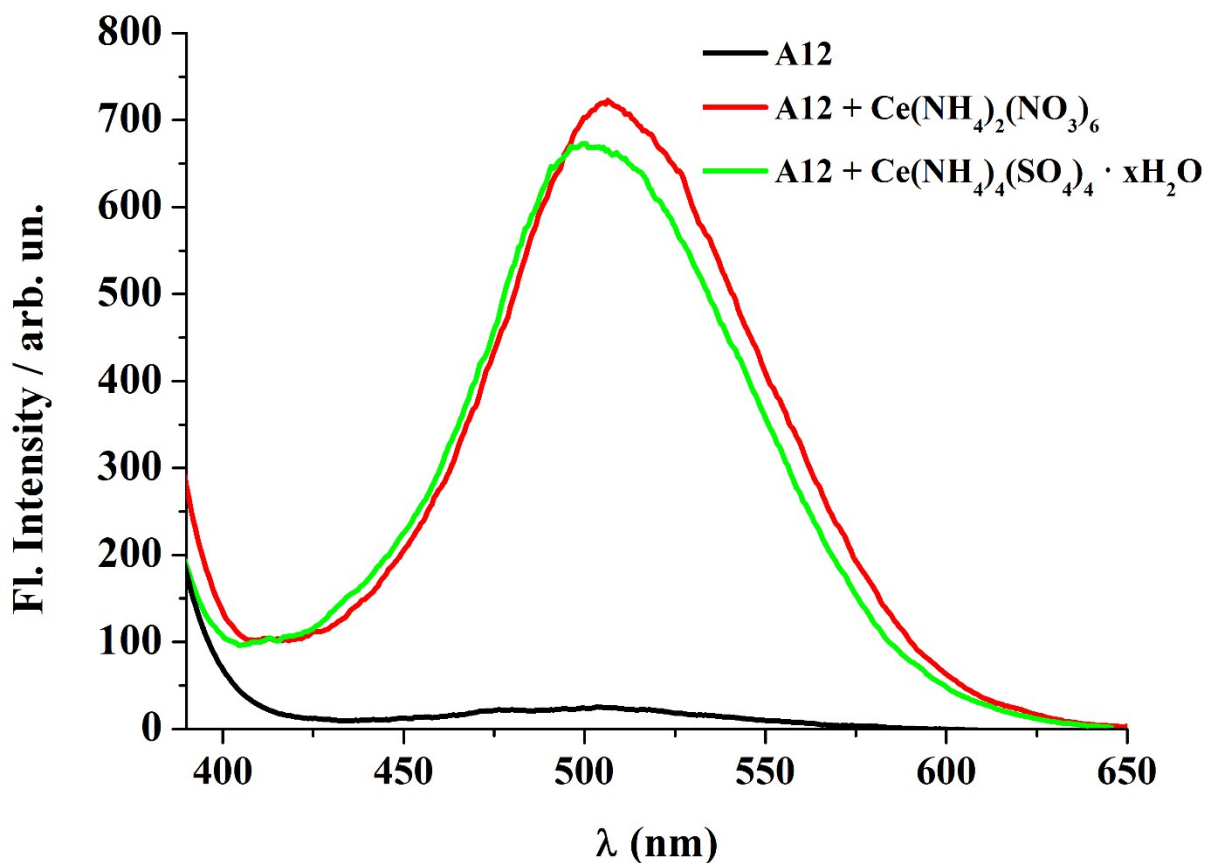

**Fig.S19** Effect of  $\text{Ce}^{4+}$  (200  $\mu\text{M}$ ) on the emission spectra of A12 (10  $\mu\text{M}$ ,  $\lambda_{\text{ex}}$ , 375 nm;  $\lambda_{\text{em}}$ , 508 nm) in ethanol-water (4: 1, v/v).

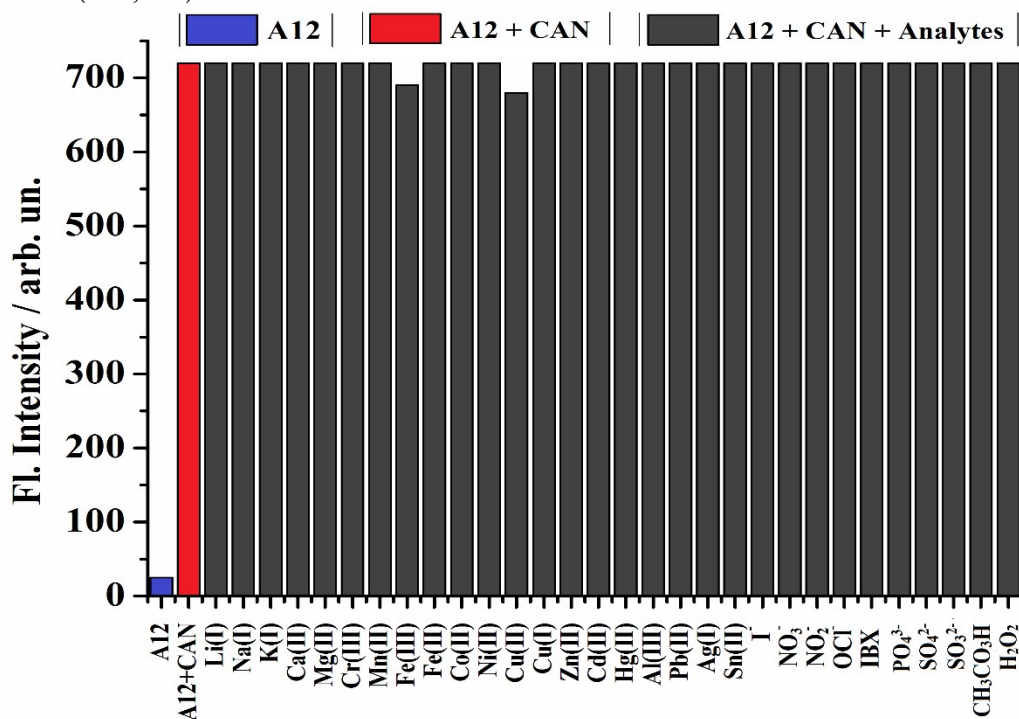

**Fig.S20** Effect of different analyte on the emission intensities of  $[\text{A12} + \text{Ce}^{4+}]$  system ( $\lambda_{\text{ex}}$ , 375 nm;  $\lambda_{\text{em}}$ , 508 nm).

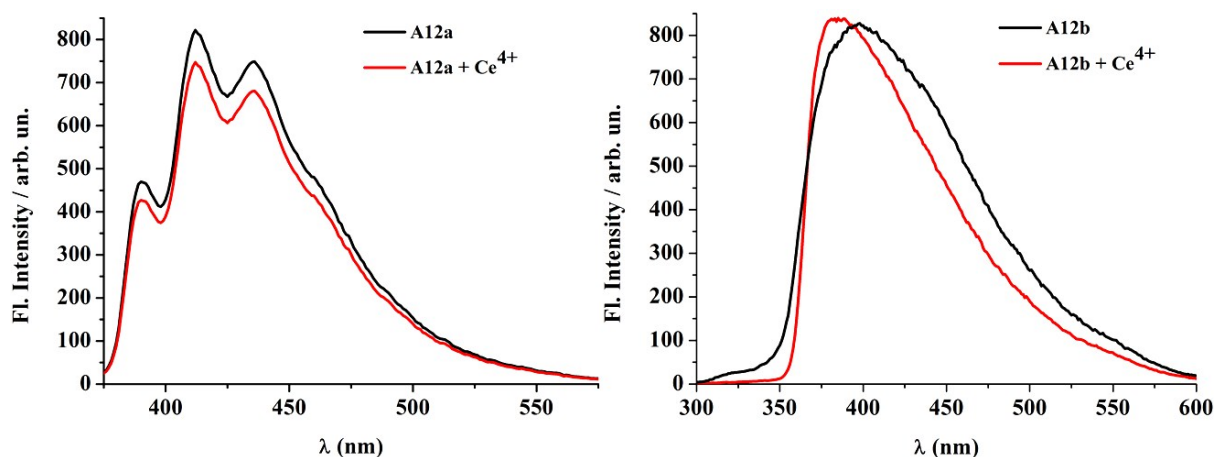

**Fig.S21** Effect of  $\text{Ce}^{4+}$  (200  $\mu\text{M}$ ) on the emission spectra of A12a (10  $\mu\text{M}$ ,  $\lambda_{\text{ex}}$ , 349 nm) and A12b (10  $\mu\text{M}$ ,  $\lambda_{\text{ex}}$ , 360 nm) in ethanol-water (4: 1, v/v).

**Table S1** Crystallographic parameters of the A12 and A12a

|                         | <b>A12</b>   | <b>A12a</b>   |
|-------------------------|--------------|---------------|
| CCDC                    | 1450504      | 1458041       |
| System                  | Orthorhombic | Triclinic     |
| Space Group             | P n/a 21     | P -1          |
| a/Å                     | 8.2558       | 10.1560       |
| b/Å                     | 24.884       | 14.3840       |
| c/Å                     | 17.450       | 17.1787       |
| $\alpha/^\circ$         | 90           | 103.925       |
| $\beta/^\circ$          | 90           | 99.209        |
| $\gamma/^\circ$         | 90           | 93.100        |
| Volume/Å <sup>3</sup>   | 3584.8       | 2393.13       |
| Z                       | 8            | 6             |
| T/K                     | 296          | 296           |
| Dx/ gm cm <sup>-3</sup> | 1.317        | 1.309         |
| Mu (mm-1)               | 0.191        | 0.203         |
| F000                    | 1488.0       | 984.0         |
| F000'                   | 1489.45      | 985.05        |
| h, k, l max             | 9, 29, 20    | 13, 19, 23    |
| N <sub>ref</sub>        | 6398         | 12058         |
| Tmin, Tmax              | 0.977, 0.992 | 0.976, 0.988  |
| Data completeness       | 1.91/0.99    | 0.981         |
| Theta max               | 25.218       | 28.627        |
| R(reflections)          | 0.0512(4026) | 0.0563(5900)  |
| wR2(reflection)         | 0.1298(6398) | 0.2040(12058) |
| S                       | 1.009        | 0.971         |
| N <sub>par</sub>        | 470          | 623           |

**Table S2** Selected bond angles and lengths of A12

| <b>Atoms</b> | <b>Angles</b> | <b>Atoms</b> | <b>Distances</b> |
|--------------|---------------|--------------|------------------|
| C15 N1 N2    | 115.0(5)      | S1 C16       | 1.676(6)         |
| C37 N4 N5    | 114.8(5)      | S2 C38       | 1.670(6)         |
| C16 N3 C17   | 128.4(5)      | N5 C38       | 1.355(7)         |
| C16 N2 N1    | 120.4(5)      | N5 N4        | 1.374(6)         |
| C38 N6 C39   | 131.2(5)      | N1 C15       | 1.275(7)         |
| C1 C14 C13   | 123.4(5)      | N1 N2        | 1.389(6)         |
| C1 C14 C9    | 119.2(5)      | N4 C37       | 1.294(7)         |
| C13 C14 C9   | 117.4(6)      | N3 C16       | 1.341(7)         |
| C40 C39 C44  | 119.1(5)      | N3 C17       | 1.431(7)         |
| C40 C39 N6   | 116.0(5)      | N2 C16       | 1.355(7)         |
| C44 C39 N6   | 124.9(5)      | N6 C38       | 1.352(7)         |
| C25 C24 C23  | 123.6(6)      | N6 C39       | 1.425(7)         |
| C25 C24 C29  | 117.5(6)      | C14 C1       | 1.417(8)         |
| C23 C24 C29  | 118.9(6)      | C14 C13      | 1.423(8)         |
| N5 C38 N6    | 114.2(5)      | C14 C9       | 1.435(8)         |
| N5 C38 S2    | 117.5(4)      | C39 C40      | 1.372(8)         |
| N6 C38 S2    | 128.3(4)      | C39 C44      | 1.385(8)         |
| C35 C36 C31  | 118.7(6)      | C24 C25      | 1.419(9)         |
| C35 C36 C23  | 123.4(6)      | C24 C23      | 1.427(8)         |
| C31 C36 C23  | 117.8(6)      | C24 C29      | 1.432(9)         |
| C30 C29 C24  | 119.0(6)      | C36 C35      | 1.425(9)         |
| C30 C29 C28  | 121.6(7)      | C36 C31      | 1.432(9)         |
| C24 C29 C28  | 119.4(8)      | C36 C23      | 1.431(8)         |
| N3 C16 N2    | 114.3(5)      | C29 C30      | 1.388(10)        |
| N3 C16 S1    | 126.1(4)      | C29 C28      | 1.433(11)        |
| N2 C16 S1    | 119.6(5)      | C17 C18      | 1.373(9)         |
| C18 C17 C22  | 120.1(6)      | C17 C22      | 1.372(9)         |
| C18 C17 N3   | 121.5(6)      | C1 C2        | 1.424(8)         |
| C22 C17 N3   | 118.3(6)      | C23 C37      | 1.472(8)         |
| N1 C15 C1    | 120.9(6)      | C35 C34      | 1.362(9)         |
| N1 C15 H15   | 119.6         | C9 C8        | 1.386(9)         |
| C1 C15 H15   | 119.6         | C9 C10       | 1.436(9)         |
| C14 C1 C2    | 120.5(5)      | C13 C12      | 1.350(9)         |
| C14 C1 C15   | 117.6(5)      | C7 C8        | 1.385(9)         |
| C2 C1 C15    | 121.8(5)      | C7 C6        | 1.441(10)        |
| C24 C23 C36  | 121.2(5)      | C7 C2        | 1.448(9)         |
| C24 C23 C37  | 115.6(6)      | C40 C41      | 1.377(9)         |
| C36 C23 C37  | 123.0(5)      | C12 C11      | 1.391(10)        |
| C34 C35 C36  | 120.9(7)      | C2 C3        | 1.432(8)         |

|             |          |         |           |
|-------------|----------|---------|-----------|
| C14 C1 C15  | 117.6(5) | C31 C30 | 1.388(10) |
| C2 C1 C15   | 121.8(5) | C31 C32 | 1.438(10) |
| C8 C9 C14   | 119.5(6) | C28 C27 | 1.335(11) |
| C8 C9 C10   | 121.8(6) | C25 C26 | 1.356(9)  |
| C14 C9 C10  | 118.7(6) | C18 C19 | 1.376(10) |
| C12 C13 C14 | 121.2(6) | C10 C11 | 1.343(9)  |
| N4 C37 C23  | 125.7(6) | C4 C5   | 1.404(11) |
| C8 C7 C6    | 122.3(7) | C22 C21 | 1.390(11) |
| C8 C7 C2    | 119.2(6) | C26 C27 | 1.414(11) |
| C6 C7 C2    | 118.5(7) | C41 C42 | 1.373(10) |
| C39 C40 C41 | 120.6(6) | C34 C33 | 1.412(11) |
| C13 C12 C11 | 121.4(7) | C42 C43 | 1.362(10) |
| C1 C2 C3    | 123.4(6) | C21 C20 | 1.378(12) |
| C1 C2 C7    | 118.7(6) | C19 C20 | 1.347(11) |
| C3 C2 C7    | 117.8(6) | C6 C5   | 1.323(11) |
| C30 C31 C36 | 120.0(7) | C33 C32 | 1.339(11) |
| C30 C31 C32 | 122.3(7) |         |           |
| C36 C31 C32 | 117.6(7) |         |           |
| C27 C28 C29 | 121.0(8) |         |           |
| C26 C25 C24 | 120.7(7) |         |           |
| C4 C3 C2    | 120.1(7) |         |           |
| C17 C18 C19 | 119.8(7) |         |           |
| C43 C44 C39 | 119.6(6) |         |           |
| C29 C30 C31 | 123.0(7) |         |           |
| C11 C10 C9  | 120.6(7) |         |           |
| C3 C4 C5    | 120.7(8) |         |           |
| C9 C8 C7    | 122.6(6) |         |           |
| C17 C22 C2  | 119.7(7) |         |           |
| C25 C26 C27 | 121.7(8) |         |           |
| C10 C11 C12 | 120.8(7) |         |           |
| C42 C41 C40 | 120.5(7) |         |           |
| C28 C27 C26 | 119.8(7) |         |           |
| C35 C34 C33 | 120.4(8) |         |           |
| C43 C42 C41 | 119.0(7) |         |           |
| C20 C21 C22 | 119.1(8) |         |           |
| C20 C19 C18 | 120.5(8) |         |           |
| C5 C6 C7    | 121.2(8) |         |           |
| C19 C20 C21 | 120.8(8) |         |           |
| C42 C43 C44 | 121.3(7) |         |           |
| C32 C33 C34 | 120.7(8) |         |           |
| C33 C32 C31 | 121.6(8) |         |           |
| C6 C5 C4    | 121.5(8) |         |           |



**Table S3** Selected bond angles and bond lengths of A12a

| <b>Atoms</b>   | <b>Angles</b> | <b>Atoms</b> | <b>Distances</b> |
|----------------|---------------|--------------|------------------|
| C01M S001 C00K | 90.67(14)     | S001 C01M    | 1.711(3)         |
| C01T S002 C00S | 91.54(16)     | S001 C00K    | 1.724(3)         |
| C00W S003 C01U | 91.46(14)     | S002 C01T    | 1.703(3)         |
| C00N N004 N006 | 111.6(2)      | S002 C00S    | 1.710(3)         |
| C00X N005 N1   | 112.1(2)      | S003 C00W    | 1.698(3)         |
| C00M N006 N004 | 112.4(2)      | S003 C01U    | 1.707(3)         |
| C00Y N007 N008 | 111.9(2)      | N004 C00N    | 1.270(3)         |
| C00R N008 N007 | 112.6(2)      | N004 N006    | 1.414(3)         |
| C00Q N1 N005   | 114.4(2)      | N005 C00X    | 1.276(3)         |
| C00G C00A C00B | 120.2(2)      | N005 N1      | 1.410(3)         |
| C00G C00A C00R | 122.7(2)      | N006 C00M    | 1.268(3)         |
| C00B C00A C00R | 116.9(2)      | N007 C00Y    | 1.272(3)         |
| C00A C00B C010 | 123.7(2)      | N007 N008    | 1.410(3)         |
| C00A C00B C00E | 119.4(2)      | N008 C00R    | 1.270(3)         |
| C010 C00B C00E | 116.9(2)      | N1 C00Q      | 1.235(3)         |
| C00D C00C C00U | 124.2(2)      | C00A C00G    | 1.416(3)         |
| C00D C00C C00P | 118.5(2)      | C00A C00B    | 1.423(3)         |
| C00U C00C C00P | 117.3(2)      | C00A C00R    | 1.456(3)         |
| C00C C00D C00I | 120.7(2)      | C00B C010    | 1.427(3)         |
| C00C C00D C00N | 122.0(2)      | C00B C00E    | 1.437(3)         |
| C00I C00D C00N | 117.1(2)      | C00C C00D    | 1.417(3)         |
| C00L C00E C012 | 121.3(2)      | C00C C00U    | 1.428(3)         |
| C00L C00E C00B | 119.0(2)      | C00C C00P    | 1.440(3)         |
| C012 C00E C00B | 119.7(2)      | C00D C00I    | 1.418(3)         |
| C00L C00F C00G | 120.2(2)      | C00D C00N    | 1.477(3)         |
| C00L C00F C00Z | 121.2(2)      | C00E C00L    | 1.386(3)         |
| C00G C00F C00Z | 118.5(2)      | C00E C012    | 1.433(3)         |
| C00A C00G C00F | 118.8(2)      | C00F C00L    | 1.387(3)         |
| C00A C00G C00T | 123.5(2)      | C00F C00G    | 1.428(3)         |
| C00F C00G C00T | 117.7(2)      | C00F C00Z    | 1.431(3)         |
| C00O C00H C00J | 120.3(2)      | C00G C00T    | 1.430(3)         |
| C00O C00H C00Q | 117.2(2)      | C00H C00O    | 1.424(4)         |
| C00J C00H C00Q | 122.5(2)      | C00H C00J    | 1.424(4)         |
| C00D C00I C016 | 123.5(2)      | C00H C00Q    | 1.469(3)         |
| C00D C00I C00V | 119.8(2)      | C00I C016    | 1.430(4)         |
| C016 C00I C00V | 116.7(2)      | C00I C00V    | 1.429(3)         |
| C00H C00J C01D | 124.1(2)      | C00J C01D    | 1.429(4)         |
| C00H C00J C01B | 119.2(3)      | C00J C01B    | 1.432(4)         |
| C01D C00J C01B | 116.7(3)      | C00K C011    | 1.376(3)         |
| C011 C00K C00X | 126.4(2)      | C00K C00X    | 1.433(3)         |
| C011 C00K S001 | 111.28(19)    | S001 C01M    | 1.711(3)         |
| C00X C00K S001 | 122.30(19)    | S001 C00K    | 1.724(3)         |
| C00F C00L C00E | 122.1(2)      | S002 C01T    | 1.703(3)         |
| C00H C00O C01J | 124.1(2)      | S002 C00S    | 1.710(3)         |
| C00H C00O C018 | 119.2(3)      | S003 C00W    | 1.698(3)         |
| C01J C00O C018 | 116.7(3)      | S003 C01U    | 1.707(3)         |
| C013 C00P C01C | 121.2(2)      | N004 C00N    | 1.270(3)         |
| C013 C00P C00C | 119.8(2)      | N004 N006    | 1.414(3)         |
| C01C C00P C00C | 119.0(2)      | N005 C00X    | 1.276(3)         |
| N004 C00N C00D | 125.2(2)      | N005 N1      | 1.410(3)         |

|                 |            |           |          |
|-----------------|------------|-----------|----------|
| N006 C00M C00S  | 123.1(2)   | N006 C00M | 1.268(3) |
| N1 C00Q C00H    | 126.5(2)   | N007 C00Y | 1.272(3) |
| N008 C00R C00A  | 123.5(2)   | N007 N008 | 1.410(3) |
| C01L C00S C00M  | 125.7(3)   | N008 C00R | 1.270(3) |
| C01L C00S S002  | 110.8(2)   | N1 C00Q   | 1.235(3) |
| C00M C00S S002  | 123.41(19) | C00A C00G | 1.416(3) |
| C014 C00T C00G  | 121.3(2)   | C00A C00B | 1.423(3) |
| C01A C00U C00C  | 121.6(2)   | C00A C00R | 1.456(3) |
| C013 C00V C00I  | 119.2(2)   | C00B C010 | 1.427(3) |
| C013 C00V C01I  | 121.3(3)   | C00B C00E | 1.437(3) |
| C00I C00V C01I  | 119.5(3)   | C00C C00D | 1.417(3) |
| C019 C00W C00Y  | 127.7(2)   | C00C C00U | 1.428(3) |
| C019 C00W S003  | 110.86(19) | C00C C00P | 1.440(3) |
| C00Y C00W S003  | 121.39(19) | C00D C00I | 1.418(3) |
| N005 C00X C00K  | 121.7(2)   | C00D C00N | 1.477(3) |
| N007 C00Y C00W  | 121.8(2)   | C00E C00L | 1.386(3) |
| C015 C00Z C00F  | 121.7(2)   | C00E C012 | 1.433(3) |
| C01K C010 C00B  | 121.1(3)   | C00F C00L | 1.387(3) |
| C00K C011 C01H  | 112.3(3)   | C00F C00G | 1.428(3) |
| C01E C012 C00E  | 120.8(3)   | C00F C00Z | 1.431(3) |
| C00V C013 C00P  | 122.1(2)   | C00G C00T | 1.430(3) |
| C00T C014 C015  | 121.2(2)   | C00H C00O | 1.424(4) |
| C00Z C015 C014  | 119.6(2)   | C00H C00J | 1.424(4) |
| C01O C016 C00I  | 121.3(3)   | C00H C00Q | 1.469(3) |
| C018 C017 C01B  | 122.8(3)   | C00I C016 | 1.430(4) |
| C017 C018 C00O  | 119.3(3)   | C00I C00V | 1.443(3) |
| C017 C018 C01Q  | 121.8(3)   | C00J C01D | 1.429(4) |
| C00O C018 C01Q  | 118.9(3)   | C00J C01B | 1.432(4) |
| C00W C019 C01F  | 112.5(2)   | C00K C011 | 1.376(3) |
| C00U C01A C01G  | 120.3(3)   | C00K C00X | 1.433(3) |
| C017 C01B C00J  | 119.3(3)   | C00M C00S | 1.429(3) |
| C017 C01B C01N  | 121.7(3)   | C00O C01J | 1.422(4) |
| C00J C01B C01N  | 119.0(3)   | C00O C018 | 1.435(4) |
| C01G C01C C00P  | 121.7(3)   | C00P C013 | 1.399(4) |
| C01S C01D C00J  | 121.6(3)   | C00P C01C | 1.419(4) |
| C012 C01E C01K  | 119.8(2)   | C00S C01L | 1.362(4) |
| C01U C01F C019  | 112.3(2)   | C00T C014 | 1.353(4) |
| C01C C01G C01A  | 120.0(3)   | C00U C01A | 1.360(4) |
| C01M C01H C011  | 112.6(3)   | C00V C013 | 1.351(4) |
| C01P C01I C00V  | 120.9(3)   | C00V C01I | 1.433(4) |
| C01W C01J C00O  | 122.0(3)   | C00W C019 | 1.382(3) |
| C00S C01L C01R  | 112.7(3)   | C00W C00Y | 1.442(3) |
| C01H C01M S001  | 113.1(2)   | C00Z C015 | 1.387(4) |
| C01X C01N C01B  | 121.6(3)   | C010 C01K | 1.366(4) |
| C016 C01O C01P  | 121.2(3)   | C011 C01H | 1.406(4) |
| C01I C01P C01O  | 120.3(3)   | C012 C01E | 1.352(4) |
| C01V C01Q C018) | 121.7(3)   | C014 C015 | 1.408(4) |
| C01T C01R C01L  | 112.6(3)   | C016 C01O | 1.360(4) |
| C01D C01S C01X  | 121.1(4)   | C017 C018 | 1.385(4) |
| C01R C01T S002  | 112.3(2)   | C017 C01B | 1.389(4) |
| C01F C01U S003  | 112.8(2)   | C018 C01Q | 1.436(4) |
| C01Q C01V C01W  | 119.9(3)   | C019 C01F | 1.398(5) |

|                |          |           |          |
|----------------|----------|-----------|----------|
| C01J C01W C01V | 120.7(4) | C01A C01G | 1.425(4) |
| C01N C01X C01S | 120.0(3) | C01D C01S | 1.356(4) |
|                |          | C01B C01N | 1.430(4) |
|                |          | C01C C01G | 1.344(4) |
|                |          | C01E C01K | 1.404(4) |
|                |          | C01F C01U | 1.333(4) |
|                |          | C01H C01M | 1.338(4) |
|                |          | C01I C01P | 1.341(5) |
|                |          | C01J C01W | 1.354(4) |
|                |          | C01N C01X | 1.339(5) |
|                |          | C01O C01P | 1.394(5) |
|                |          | C01Q C01V | 1.326(5) |
|                |          | C01R C01T | 1.334(4) |
|                |          | C01S C01X | 1.403(4) |
|                |          | C01V C01W | 1.415(5) |

## References

1. (a) M. Shortreed, R. Kopelman, M. Kuhn and B. Hoyland, *Anal. Chem.*, 1996, **68**, 1414; (b) A. Caballero, R. Martinez, V. Lloveras, I. Ratera, J. V. Gancedo, K. Wurst, A. Tarraga, P. Molina and J. Veciana, *J. Am. Chem. Soc.*, 2005, **127**, 15666; (c) S. Das, A. Sahana, A. Banerjee, S. Lohar, D. A. Safin, M. G. Babashkina, M. Bolte, Y. Garcia, I. Hauli, S. K. Mukhopadhyay and D. Das, *Dalton Trans.*, 2013, **42**, 4757; (d) A. Ghosh, A. Sengupta, A. Chattopadhyay and D. Das, *Chem. Commun.*, 2015, **51**, 11455.
